# Supplementary material for: Biosurfer for systematic tracking of regulatory mechanisms leading to protein isoform diversity
Source: HighWire-hosted journal article supplement (doi:10.1101/gr.279317.124), 2025-03-14
Supplement: Supplemental_Fig_S2.pdf [file Supplemental_Fig_S2.pdf]

## Transcript-centric alignment

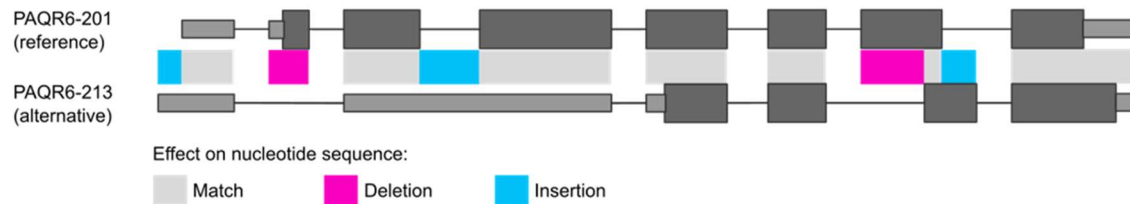

## Codon-centric alignment

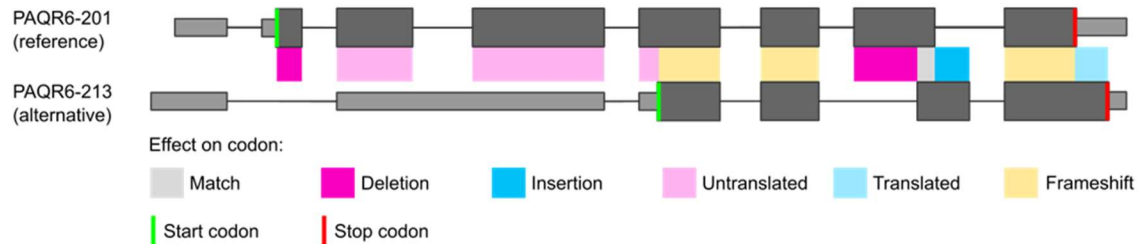

## Protein-centric alignment

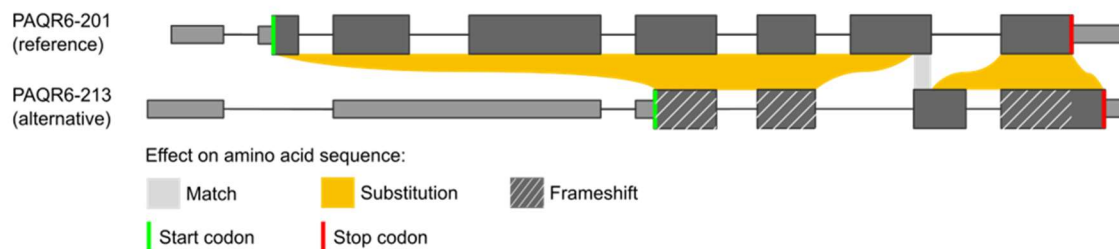

### ***Supplementary Figure S2: Biosurfer implements a multi-layered alignment to track source of protein alterations.***

Biosurfer utilizes a multi-layered comparison that integrates both exon-intron structure and protein-centric perspectives for comparing isoforms. Here is shown a particularly complex example of the comparisons between *PAQRG* isoforms annotated in GENCODE, to illustrate the utility of Biosurfer. Note that though the terminology in each level is similar (Match, Deletion, etc.), they refer to different modes of comparison (e.g., nucleotides versus codons).
