# Supplementary material for: Biosurfer for systematic tracking of regulatory mechanisms leading to protein isoform diversity
Source: HighWire-hosted journal article supplement (doi:10.1101/gr.279317.124), 2025-03-14
Supplement: Supplemental_Fig_S3.pdf [file Supplemental_Fig_S3.pdf]

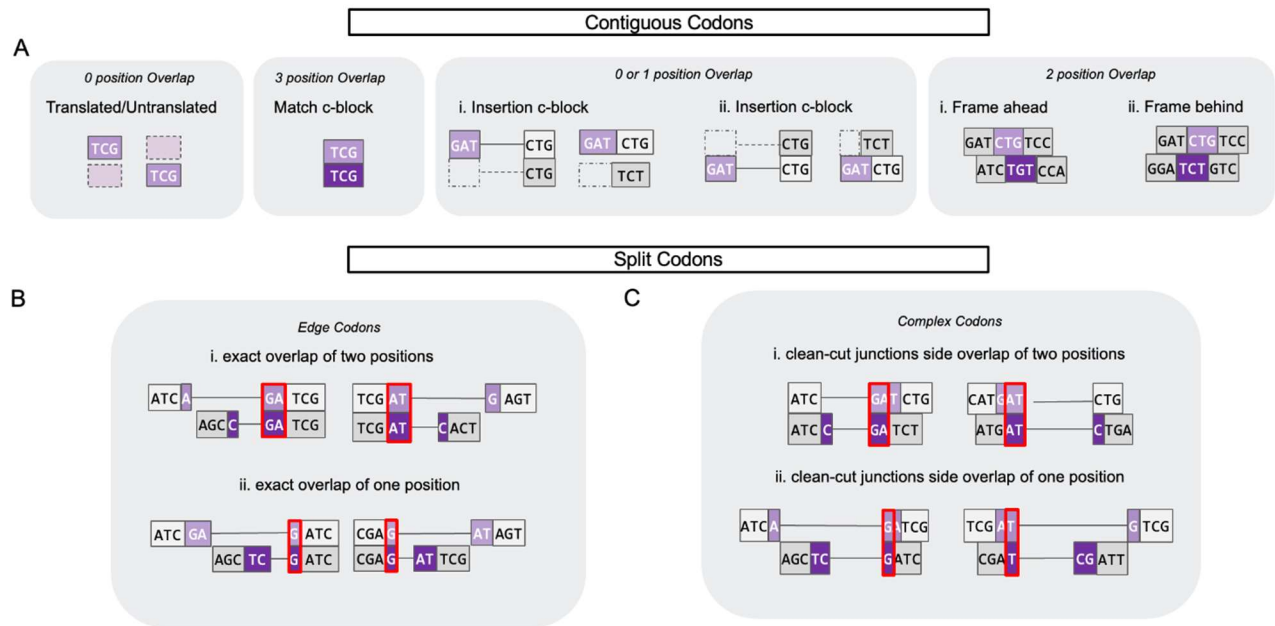

**Supplementary Figure S3: Schemas of c-blocks categories.**

Schematic of the c-block categories described in **Table 1**. Contiguous (above) codons require that the two codons compared are not split across junctions, whereas split codons (below) involve codons that span alternative junctions. Note that Complex c-blocks are indeed codons that reside at the “edge” of a junction; however, Complex c-blocks display different codon topologies compared to Edge c-blocks due to being frameshifted with respect to each other.
