# Supplementary material for: Biosurfer for systematic tracking of regulatory mechanisms leading to protein isoform diversity
Source: HighWire-hosted journal article supplement (doi:10.1101/gr.279317.124), 2025-03-14
Supplement: Supplemental_Fig_S5.pdf [file Supplemental_Fig_S5.pdf]

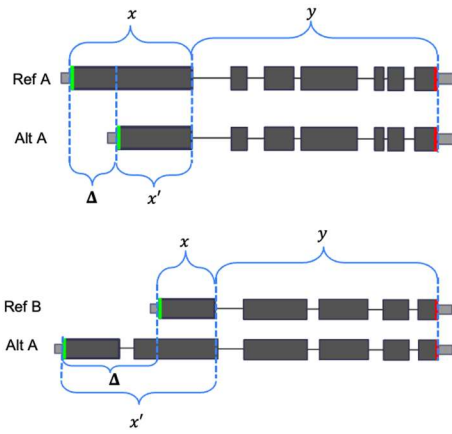

$$\Delta_{nterm} = |x - x'|$$

$$Nterm \text{ relative length change} = \frac{\text{Change in } nterm \text{ region}}{\text{Total reference isoform length}} = \frac{\Delta_{nterm}}{x + y}$$

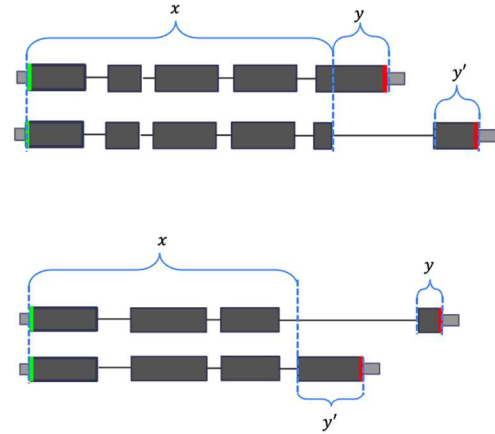

$$\Delta_{cterm} = |y - y'|$$

$$Cterm \text{ relative length change} = \frac{\text{Change in } cterm \text{ region}}{\text{Total reference isoform length}} = \frac{\Delta_{cterm}}{x + y}$$

**Supplementary Figure S5: Schema showing procedure to compute differential lengths of the affected N-terminal (or C-terminal) region between an isoform pair.**

The magnitude of the differential of N- or C-terminal terminal lengths is computed (Delta parameter), and the proportion of the affected region derived by dividing the magnitude of Delta by the length of the reference protein isoform.
