# Supplementary material for: Biosurfer for systematic tracking of regulatory mechanisms leading to protein isoform diversity
Source: HighWire-hosted journal article supplement (doi:10.1101/gr.279317.124), 2025-03-14
Supplement: Supplemental_Fig_S15.pdf [file Supplemental_Fig_S15.pdf]

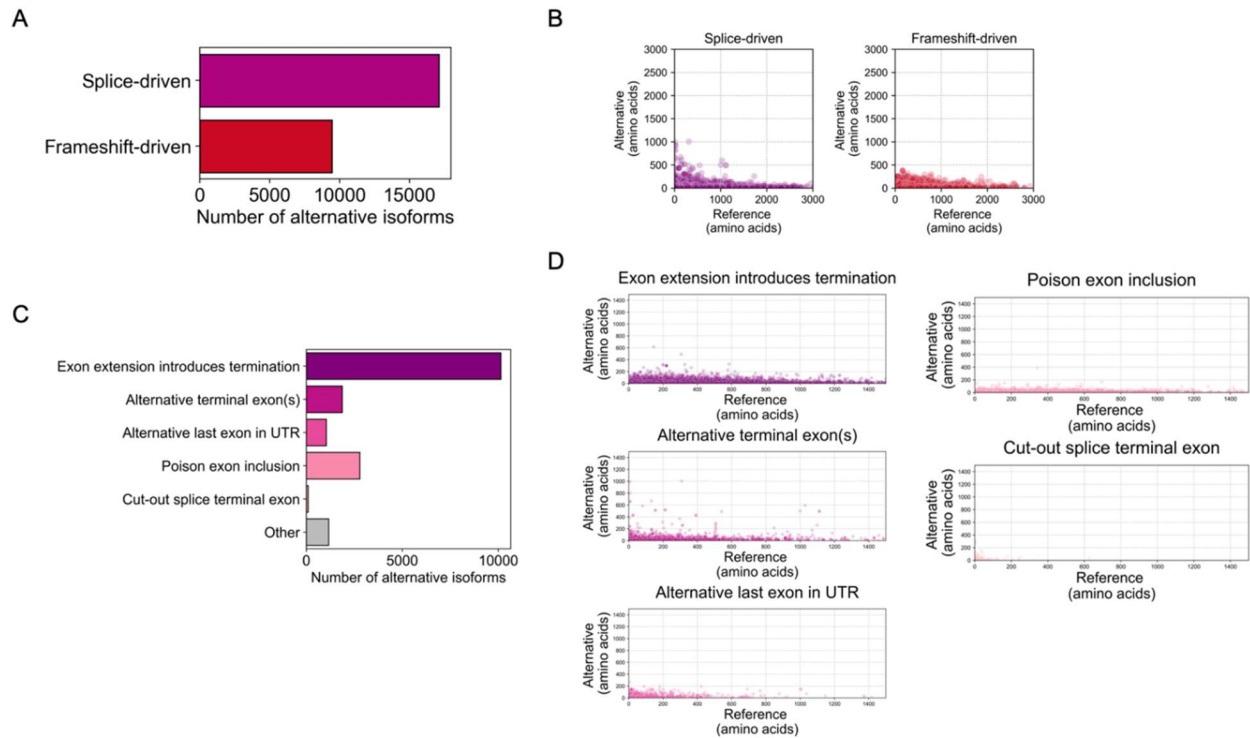

**Supplementary Figure S15: Analysis of alternative C-terminal protein sequences in the WTC-11 long-read predicted proteome.**

(A) Frequencies of primarily splice-driven or frameshift-driven mechanisms underlying C-terminal protein variation. (B) Distribution of different splice-driven altered C-terminal categories and change in the altered region length normalized by the APPRIS-ref isoform length and the change in reference-relative lengths of their altered C-terminal regions. (C) Distribution of the frequencies for various splice-driven patterns. (D) Distribution of the normalized altered region lengths for various splice-driven patterns (shown in (C)).
